# Supplementary material
Source: publisher figshare collection journal article supplement (https://adisjournals.figshare.com/articles/dataset/_/12200147)
Supplement: Supplementary file 2 [file 2]

# Benefits of tiotropium/olodaterol in patients with COPD receiving only LAMA at baseline: pooled analysis of TONADO®/OTEMTO®

## TONADO® 1+2

Phase III, randomised, double-blind trials in patients with moderate-to-very severe COPD (52 weeks)

## OTEMTO® 1+2

Phase III, randomised, double-blind trials in patients with moderate-to-severe COPD (12 weeks)

Greater improvements with T/O vs tio alone in:

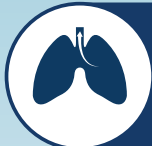

Lung function

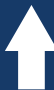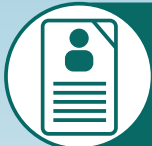

Health status

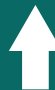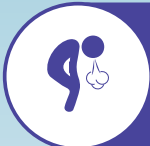

Dyspnoea

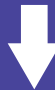

Post hoc analysis of

299

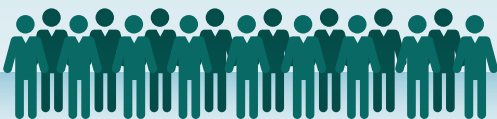

patients from TONADO® and OTEMTO® who were receiving only LAMA at study entry

Patients received T/O 5/5 µg or tio 5 µg

+0.074 L<sup>a</sup>  
Trough  
FEV<sub>1</sub>

P=0.0004

-2.675<sup>a</sup>  
SGRQ  
total  
score

P=0.0280

+1.148<sup>a</sup>  
TDI  
score

P=0.0001

<sup>a</sup>Mean difference between T/O 5/5 µg and tio 5 µg after 12 weeks in patients receiving LAMA at baseline  
Similar adverse event profiles were noted between the two treatment arms

**Conclusion:** these results support treatment escalation to dual bronchodilation in patients receiving LAMA monotherapy, without compromising patient safety

COPD, chronic obstructive pulmonary disease; FEV<sub>1</sub>, forced expiratory volume in 1 second; LAMA, long-acting muscarinic antagonist; SGRQ, St. George's Respiratory Questionnaire; T/O, tiotropium/olodaterol; TDI, Transition Dyspnoea Index; tio, tiotropium

This graphical abstract represents the opinions of the authors. For a full list of declarations, including funding and author disclosure statements, please see the full text online. ©The authors, CC-BY-NC 2020.

PEER-REVIEWED  
INFOGRAPHIC

OPEN  
ACCESS

Adis
